# Supplementary material for: Insight into the Role of Surface Wettability in Electrocatalytic Hydrogen Evolution Reactions Using Light-Sensitive Nanotubular TiO2 Supported Pt Electrodes
Source: PubMed Central journal article supplement (PMC5292970; doi:10.1038/srep41825), 2017-02-06
Supplement: srep41825-s1.pdf [file srep41825-s1.pdf]

## Supplementary information

Insight into the Role of Surface Wettability in Electrocatalytic Hydrogen Evolution Reactions Using Light-Sensitive Nanotubular TiO<sub>2</sub> Supported Pt Electrodes

Chenhui Meng<sup>1</sup>, Bing Wang<sup>1</sup>, Ziyue Gao<sup>1</sup>, Zhaoyue Liu<sup>1\*</sup>, Qianqian Zhang<sup>2\*</sup> & Jin Zhai<sup>1\*</sup>

<sup>1</sup> Key Laboratory of Bio-Inspired Smart Interfacial Science and Technology of Ministry of Education, Beijing Key Laboratory of Bio-inspired Energy Materials and Devices, School of Chemistry and Environment, Beihang University, Beijing 10019, China.

<sup>2</sup> School of Physics and Nuclear Energy Engineering, Beihang University, Beijing 100191, China.

\*Corresponding Author. E-mail: [liuzy@buaa.edu.cn](mailto:liuzy@buaa.edu.cn); [zhangqq@buaa.edu.cn](mailto:zhangqq@buaa.edu.cn); [zhaijin@buaa.edu.cn](mailto:zhaijin@buaa.edu.cn)

### Contents:

**Figure S1.** EDX patterns of OTS-modified Pt-TiO<sub>2</sub>-NTs after UV illumination for 200 min on the specific surface of (a) Pt particles and (b) TiO<sub>2</sub> nanotubes. It is found that Si elements mainly distribute on the surface of TiO<sub>2</sub> nanotubes, which indicates that OTS molecules easily bond to TiO<sub>2</sub> nanotubes.

**Figure S2.** Magnified polarization curves of OTS-modified Pt-TiO<sub>2</sub>-NTs at potential ranging -0.08 and 0 V (vs. SHE) when the UV illumination time is 0, 5 and 50 min in 0.5 M H<sub>2</sub>SO<sub>4</sub>. Following the decrease of water CA by UV illumination, the current density for HERs increases.

**Video S1:** The video of Pt-TiO<sub>2</sub>-NTs with a water CA of ~139 °during polarization process demonstrates that small hydrogen bubbles will merge into a large one, which sticks on the electrode surface strongly.

**Video S2:** The video of Pt-TiO<sub>2</sub>-NTs with a water CA of ~14 °during polarization process indicates that most of large hydrogen bubbles can leave the electrode surface quickly during hydrogen evolution.

**Video S3:** A gas bubble is easy to adhere onto the surface of hydrophobic Pt-TiO<sub>2</sub>-NTs with a water CA of ~139 °because of its large adhesion force.

**Video S4:** A gas bubble is very hard to adhere onto the surface of hydrophilic Pt-TiO<sub>2</sub>-NTs with a water CA of ~14 °because of its extremely low adhesion force.

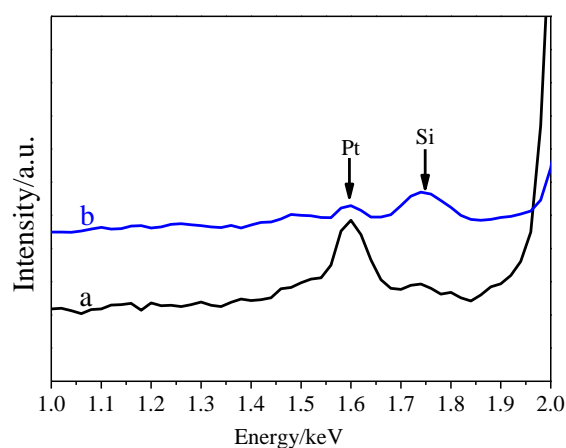

**Figure S1.** EDX patterns of OTS-modified Pt-TiO<sub>2</sub>-NTs after UV illumination for 200 min on the specific surface of (a) Pt particles and (b) TiO<sub>2</sub> nanotubes. It is found that Si elements mainly distribute on the surface of TiO<sub>2</sub> nanotubes, which indicates that OTS molecules easily bond to TiO<sub>2</sub> nanotubes.

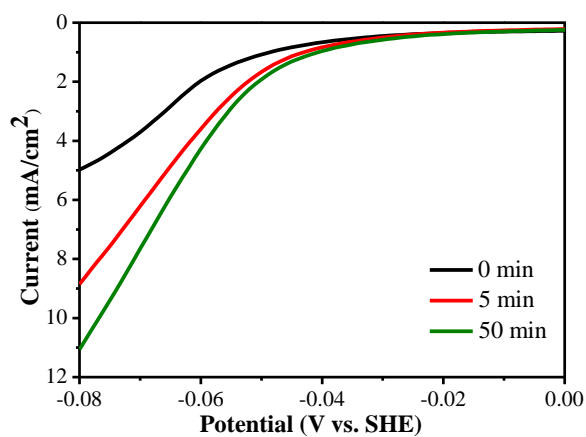

**Figure S2.** Magnified polarization curves of OTS-modified Pt-TiO<sub>2</sub>-NTs at potential ranging -0.08 and 0 V (vs. SHE) when the UV illumination time is 0, 5 and 50 min in 0.5 M H<sub>2</sub>SO<sub>4</sub>. Following the decrease of water CA by UV illumination, the current density for HERs increases.
